# Supplementary material
Source: publisher site journal article supplement (https://www.dovepress.com/article/357746)
Supplement: Supplementary file 1 [file get_supplementary_file.php]

Table S1. Analysis of risk factors of CR-GNB 7-day clearance failure of PMB treatment

| Parameters | Success  N=96 | Failure  N=230 | P | Binary Logistic regression | | | | |
| --- | --- | --- | --- | --- | --- | --- | --- | --- |
| B | OR | 95%CI | | P | |
| Sex（male） | 66（68.75%） | 165（71.74%） | 0.588 |  |  |  | |  | |
| Age(years) | 58(46.50-74.25) | 58(48-69) | 0.734 |  |  |  | |  | |
| Mechanical ventilation | 66（68.75%） | 170（73.91%） | 0.342 |  |  |  | |  | |
| Vasoactive agents | 50（52.08%） | 124（53.91%） | 0.763 |  |  |  | |  | |
| Admission to ICU | 66（68.75%） | 170（73.91%） | 0.342 |  |  |  | |  | |
| APACHE II score | 20(15-24) | 20(14-26) | 0.821 |  |  |  | |  | |
| Primary disease |  |  |  |  |  |  | |  | |
| Cardiovascular and cerebrovascular diseases | 62（64.58%） | 145（63.04%） | 0.792 |  |  |  | |  | |
| Respiratory diseases | 83（86.46%） | 188（81.74%） | 0.300 |  |  |  | |  | |
| Kidney disease | 39（40.63%） | 109（47.39%） | 0.263 |  |  |  | |  | |
| Liver disease | 19（19.79%） | 57（24.78%） | 0.331 |  |  |  | |  | |
| Diseases of digestive system | 19（19.79%） | 50（21.74%） | 0.695 |  |  |  | |  | |
| Nutritional diseases | 24（25.00%） | 30（13.04%） | **0.008** | **-0.852** | **0.427** | **0.225-0.810** | | **0.009** | |
| Diabetes mellitus | 22（22.92%） | 41（17.83%） | 0.289 |  |  |  | |  | |
| Infection site |  |  |  |  |  |  | |  | |
| Respiratory tract | 85（88.54%） | 206（89.57%） | 0.786 |  |  |  | |  | |
| Blood | 25（26.04%） | 56（24.35%） | 0.747 |  |  |  | |  | |
| Urinary system | 15（15.63%） | 19（8.26%） | **0.047** | **-0.899** | **0.407** | **0.185-0.896** | | **0.026** | |
| Intracranial | 6（6.25%） | 12（5.22%） | 0.710 |  |  |  | |  | |
| Digestive tract | 8（8.33%） | 28（12.17%） | 0.313 |  |  |  | |  | |
| Wound | 0（0.00%） | 10（4.34%） | 0.085 | 20.451 | 7600 | 0.000- | | 0.999 | |
| Pathogenic bacteria |  |  |  |  |  |  | |  | |
| *Acinetobacter baumannii* | 59（61.46%） | 101（43.91%） | **0.004** | **-0.685** | **0.504** | **0.281-0.905** | | **0.022** | |
| *Klebsiella pneumoniae* | 26（27.08%） | 77（33.48%） | 0.258 |  |  |  | |  | |
| *Pseudomonas aeruginosa* | 9（9.38%） | 47（20.43%） | **0.016** | 0.550 | 1.734 | 0.729-4.124 | | 0.213 | |
| *Escherichia coli* or *Enterobacter cloacae* | 2（2.08%） | 5（2.17%） | 1.000 |  |  |  | |  | |
| Multiple site infection | 53（55.21%） | 123（53.48%） | 0.775 |  |  |  | |  | |
| Antimicrobial susceptibility |  |  |  |  |  |  | |  | |
| Tigecycline MIC >2 (mg/L) | 62（64.58%） | 140（60.87%） | 0.136 |  |  |  | |  | |
| Polymyxin MIC >2 (mg/L) | 1（1.00%） | 9（3.90%） | 0.303 |  |  |  | |  | |
| Previous carbapenem treatment time(days) | 3.5(0-12) | 5(0-12.25) | 0.449 |  |  |  | |  | |
| Previous tigecycline treatment time(days) | 0(0-7) | 0(0-8) | 0.179 |  |  |  | |  | |
| Previous use of carbapenem | 60（62.50%） | 155（67.40%） | 0.396 |  |  |  | |  | |
| Previous use of tigecycline | 35（36.50%） | 107（46.50%） | 0.095 | 0.301 | 1.351 | 0.790-2.312 | | 0.272 | |
| Preemptive therapy | 82（85.40%） | 168（73.00%） | **0.016** | **-0.774** | **0.461** | **0.236-0.903** | **0.024** | |
| Delay days of PMB use（days） | 0（0-1） | 0(0-3) | 0.120 |  |  |  |  | |
| Loading dose≥2.0mg/kg | 21（21.88%） | 57（24.78%） | 0.575 |  |  |  |  | |
| Maintenance dose≥1.25mg/kg q12h | 12（12.50%） | 32（13.91%） | 0.734 |  |  |  |  | |
| Use loading dose | 43（44.79%） | 106（46.09%） | 0.831 |  |  |  |  | |
| Maintenance dose (mg/kg q12h) | 0.83(0.83-1.00) | 0.83(0.83-1.00) | 0.836 |  |  |  |  | |
| Loading dose（mg/kg） | 1(0.83-1.67) | 1.08(0.83-1.72) | 0.617 |  |  |  |  | |
| Cumulative dose（mg） | 925(600-1387) | 1150(650-1500) | 0.225 |  |  |  |  | |
| Treatment duration time（days） | 9.75(6.50-13.38) | 11.75(7.50-15.50) | 0.139 |  |  |  |  | |
| Combination of drugs |  |  |  |  |  |  |  | |
| Tigecycline | 33（34.38%） | 83（36.09%） | 0.769 |  |  |  |  | |
| Carbapenems | 22（22.92%） | 68（29.57%） | 0.221 |  |  |  |  | |
| β-lactams | 33（34.38%） | 76（33.04%） | 0.816 |  |  |  |  | |
| Glycopeptides | 14（14.58%） | 37（16.09%） | 0.733 |  |  |  |  | |
| Other | 12（12.50%） | 33（14.35%） | 0.659 |  |  |  |  | |

PMB, Polymyxin B; ICU, Intensive Care Unit; APACHE II, Acute Physiology and Chronic Health Evaluation II; CR-GNB,Carbapenem-resistant Gram-negative Bacteria; MIC, minimum inhibitory concentration. Bold font indicates data with significant differences. B indicates regression coefficient.
